# Supplementary material for: High-latitude crochet: solar-flare-induced magnetic disturbance independent from low-latitude crochet
Source: Copernicus journal article supplement (doi:10.5194/angeo-38-1159-2020), 2020-11-03
Supplement: Supplementary file 1 [file angeo-38-1159-2020-supplement.zip]

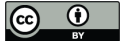

## *Supplement of*

# **High-latitude crochet: solar-flare-induced magnetic disturbance independent from low-latitude crochet**

**Masatoshi Yamauchi et al.**

*Correspondence to:* Masatoshi Yamauchi (m.yamauchi@irf.se)

- [angeo-38-1159-2020-supplement-title-page.pdf](#)
- [Yamauchi\\_angeo-2020-48-supplement](#)
  - [.DS\\_Store](#)
  - [19920227\\_ASYSYM.gif](#)
  - [19920625\\_ASYSYM.gif](#)
  - [19921102\\_ASYSYM.gif](#)
  - [19960709\\_ASYSYM.gif](#)
  - [19971104\\_ASYSYM.gif](#)
  - [19971106\\_ASYSYM.gif](#)
  - [19971127\\_ASYSYM.gif](#)
  - [19980506\\_ASYSYM.gif](#)
  - [19980818\\_ASYSYM.gif](#)
  - [19980818b\\_ASYSYM.gif](#)
  - [19980819\\_ASYSYM.gif](#)
  - [19981122\\_ASYSYM.gif](#)
  - [19981122b\\_ASYSYM.gif](#)
  - [19981123\\_ASYSYM.gif](#)
  - [19981128\\_ASYSYM.gif](#)
  - [20000606\\_ASYSYM.gif](#)
  - [20000714\\_ASYSYM.gif](#)
  - [20001124\\_ASYSYM.gif](#)
  - [20001124a\\_ASYSYM.gif](#)
  - [20001126\\_ASYSYM.gif](#)
  - [20010402a\\_ASYSYM.gif](#)

- 20010402c\_ASYSYM.gif
- 20010406\_ASYSYM.gif
- 20010410\_ASYSYM.gif
- 20010412\_ASYSYM.gif
- 20010415\_ASYSYM.gif
- 20010825-ASYSYM.gif
- 20010924\_ASYSYM.gif
- 20011211\_ASYSYM.gif
- 20011213\_ASYSYM.gif
- 20011228\_ASYSYM.gif
- 20020520\_ASYSYM.gif
- 20020715\_ASYSYM.gif
- 20020720\_ASYSYM.gif
- 20020723\_ASYSYM.gif
- 20020824\_ASYSYM.gif
- 20030528\_ASYSYM.gif
- 20031023\_ASYSYM.gif
- 20031028\_ASYSYM.gif
- 20031029\_ASYSYM.gif
- 20031102\_ASYSYM.gif
- 20031103\_ASYSYM.gif
- 20031103a\_ASYSYM.gif
- 20031104\_ASYSYM.gif
- 20040716\_ASYSYM.gif
- 20041107\_ASYSYM.gif
- 20041110\_ASYSYM.gif
- 20050115\_ASYSYM.gif
- 20050115a\_ASYSYM.gif
- 20050117\_ASYSYM.gif
- 20050120\_ASYSYM.gif
- 20050907\_ASYSYM.gif
- 20050908\_ASYSYM.gif
- 20050909\_ASYSYM.gif
- 20050909a\_ASYSYM.gif
- 20050910\_ASYSYM.gif
- 20061205\_ASYSYM.gif
- 20061206\_ASYSYM.gif
- 20061213\_ASYSYM.gif
- 20110215\_ASYSYM.gif
- 20110809\_ASYSYM.gif
- 20110906\_ASYSYM.gif
- 20120307\_ASYSYM.gif

- 20130513a\_ASYSYM.gif
- 20130513b\_ASYSYM.gif
- 20130514\_ASYSYM.gif
- 20131025\_ASYSYM.gif
- 20131029\_ASYSYM.gif
- 20131105\_ASYSYM.gif
- 20140225\_ASYSYM.gif
- 20140610\_ASYSYM.gif
- 20141024\_ASYSYM.gif
- 20141026\_ASYSYM.gif
- 20141027\_ASYSYM.gif
- 20150311\_ASYSYM.gif
- 20150505\_ASYSYM.gif
- 20170906\_ASYSYM.gif
- 20170910\_ASYSYM.gif

- \_\_MACOSX

- Yamauchi\_angeo-2020-48-supplement
  - \* .\_DS\_Store
  - \* .\_19920227\_ASYSYM.gif
  - \* .\_19920625\_ASYSYM.gif
  - \* .\_19921102\_ASYSYM.gif
  - \* .\_19960709\_ASYSYM.gif
  - \* .\_19971104\_ASYSYM.gif
  - \* .\_19971106\_ASYSYM.gif
  - \* .\_19971127\_ASYSYM.gif
  - \* .\_19980506\_ASYSYM.gif
  - \* .\_19980818\_ASYSYM.gif
  - \* .\_19980818b\_ASYSYM.gif
  - \* .\_19980819\_ASYSYM.gif
  - \* .\_19981122\_ASYSYM.gif
  - \* .\_19981122b\_ASYSYM.gif
  - \* .\_19981123\_ASYSYM.gif
  - \* .\_19981128\_ASYSYM.gif
  - \* .\_20000606\_ASYSYM.gif
  - \* .\_20000714\_ASYSYM.gif
  - \* .\_20001124\_ASYSYM.gif
  - \* .\_20001124a\_ASYSYM.gif
  - \* .\_20001126\_ASYSYM.gif
  - \* .\_20010402a\_ASYSYM.gif
  - \* .\_20010402c\_ASYSYM.gif
  - \* .\_20010406\_ASYSYM.gif
  - \* .\_20010410\_ASYSYM.gif
  - \* .\_20010412\_ASYSYM.gif
  - \* .\_20010415\_ASYSYM.gif
  - \* .\_20010825-ASYSYM.gif

- \* .\_20010924\_ASYSYM.gif
- \* .\_20011211\_ASYSYM.gif
- \* .\_20011213\_ASYSYM.gif
- \* .\_20011228\_ASYSYM.gif
- \* .\_20020520\_ASYSYM.gif
- \* .\_20020715\_ASYSYM.gif
- \* .\_20020720\_ASYSYM.gif
- \* .\_20020723\_ASYSYM.gif
- \* .\_20020824\_ASYSYM.gif
- \* .\_20030528\_ASYSYM.gif
- \* .\_20031023\_ASYSYM.gif
- \* .\_20031028\_ASYSYM.gif
- \* .\_20031029\_ASYSYM.gif
- \* .\_20031102\_ASYSYM.gif
- \* .\_20031103\_ASYSYM.gif
- \* .\_20031103a\_ASYSYM.gif
- \* .\_20031104\_ASYSYM.gif
- \* .\_20040716\_ASYSYM.gif
- \* .\_20041107\_ASYSYM.gif
- \* .\_20041110\_ASYSYM.gif
- \* .\_20050115\_ASYSYM.gif
- \* .\_20050115a\_ASYSYM.gif
- \* .\_20050117\_ASYSYM.gif
- \* .\_20050120\_ASYSYM.gif
- \* .\_20050907\_ASYSYM.gif
- \* .\_20050908\_ASYSYM.gif
- \* .\_20050909\_ASYSYM.gif
- \* .\_20050909a\_ASYSYM.gif
- \* .\_20050910\_ASYSYM.gif
- \* .\_20061205\_ASYSYM.gif
- \* .\_20061206\_ASYSYM.gif
- \* .\_20061213\_ASYSYM.gif
- \* .\_20110215\_ASYSYM.gif
- \* .\_20110809\_ASYSYM.gif
- \* .\_20110906\_ASYSYM.gif
- \* .\_20120307\_ASYSYM.gif
- \* .\_20130513a\_ASYSYM.gif
- \* .\_20130513b\_ASYSYM.gif
- \* .\_20130514\_ASYSYM.gif
- \* .\_20131025\_ASYSYM.gif
- \* .\_20131029\_ASYSYM.gif
- \* .\_20131105\_ASYSYM.gif
- \* .\_20140225\_ASYSYM.gif
- \* .\_20140610\_ASYSYM.gif
- \* .\_20141024\_ASYSYM.gif
- \* .\_20141026\_ASYSYM.gif
- \* .\_20141027\_ASYSYM.gif

- \* .\_20150311\_ASYSYM.gif
- \* .\_20150505\_ASYSYM.gif
- \* .\_20170906\_ASYSYM.gif
- \* .\_20170910\_ASYSYM.gif

The copyright of individual parts of the supplement might differ from the CC BY 4.0 License.
